# Supplementary material for: A self-healing high-performance phosphorus composite anode enabled by in situ preformed intermediate lithium sulfides
Source: Royal Society of Chemistry journal article supplement (doi:10.1039/c9ta06868f), 2019-01-01
Supplement: c9ta06868f1.pdf [file c9ta06868f1.pdf]

## Self-healing High-performance Phosphorus Composite Anode Enabled by in-situ Preformed Intermediate Lithium Sulfides

Weiqliang Kong<sup>a</sup>, Zhongsheng Wen<sup>\*a</sup>, Zhaoyang Zhou<sup>a</sup>, Guanqin Wang<sup>a</sup>, Jinpeng Yin<sup>a</sup>, Liying Cui<sup>a</sup>, Wei Sun<sup>b</sup>

<sup>a</sup> Department of Materials, Dalian Maritime University, Dalian 116026, China

<sup>b</sup> School of Minerals Processing and Bioengineering, Central South University, Changsha 410083, China

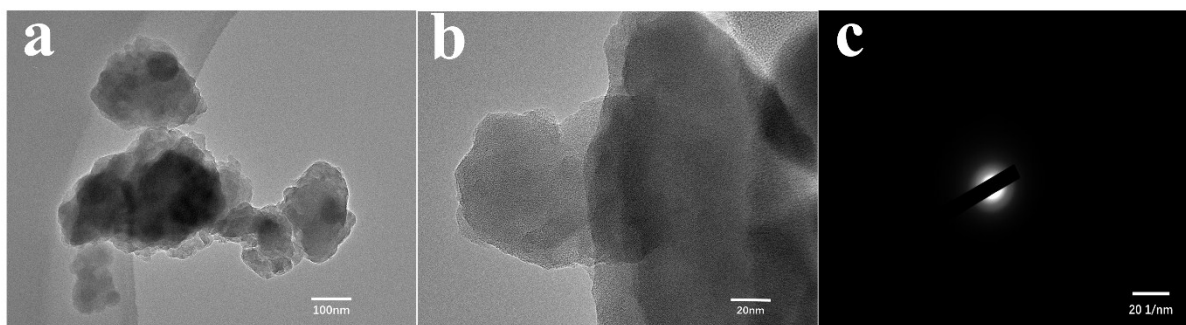

**Fig. S1** (a) and (b) TEM images of PS/C composite; (c) SAED pattern of PS/C composite.

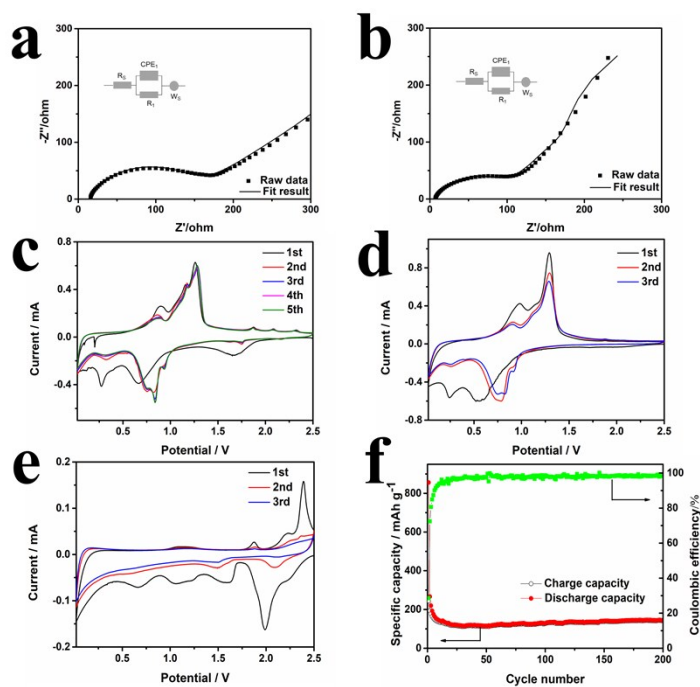

**Fig. S2** (a) Nyquist plot of P electrode measured before cycling with selected equivalent circuit (inset), and (b) Nyquist plot of the PS electrode with selected equivalent circuit (inset); (c) Cyclic voltammetry

curves of PS/C composite from the 1st to the 5th cycle at a scan rate of  $0.1 \text{ mV s}^{-1}$ ; (d) Cyclic voltammetry curves of P electrode from the 1st to the 2nd cycle at a scan rate of  $0.1 \text{ mV s}^{-1}$ ; (e) Cyclic voltammetry curves of S composite from the 1st to the 3rd cycle at a scan rate of  $0.1 \text{ mV s}^{-1}$ ; (f) Cycling performance and the corresponding Coulombic efficiency of S with the potential window of between 0.02 V and 2.5 V (vs.  $\text{Li}^+/\text{Li}$ ) at the current density of  $200 \text{ mA g}^{-1}$  for 200 cycles.

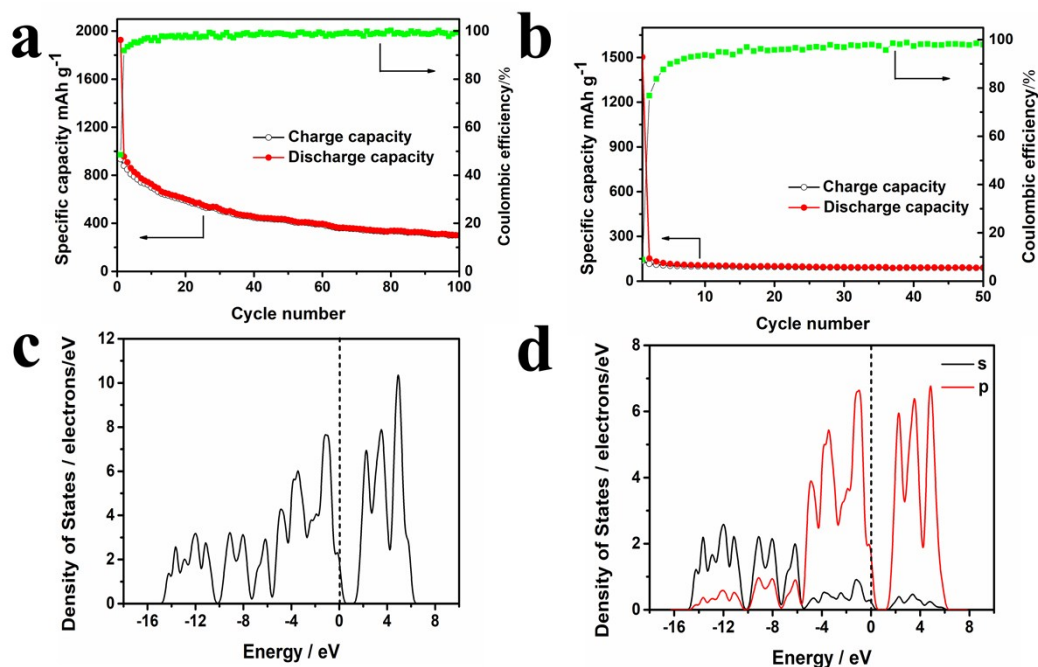

**Fig. S3** (a) Cycling performance and the corresponding Coulombic efficiency of PS/C with the potential window of between 0.02 V and 1.6 V (vs.  $\text{Li}^+/\text{Li}$ ) at the current density of  $200 \text{ mA g}^{-1}$  for 100 cycles; (b) Cycling performance and the corresponding Coulombic efficiency of S with the potential window of between 0.02 V and 1.6 V (vs.  $\text{Li}^+/\text{Li}$ ) at the current density of  $200 \text{ mA g}^{-1}$  for 50 cycles; (c) The total DOS of P; (d) The PDOS of P.

**Table S1** Results of EIS,  $\sigma$  and D in P, PS, PS/C

| <b>Active Material</b> | <b><math>R_s</math> [<math>\Omega</math>]</b> | <b><math>R_1</math> [<math>\Omega</math>]</b> | <b><math>W</math> [<math>\Omega</math>]</b> | <b><math>\sigma</math> [ <math>S\ cm^{-1}</math> ]</b> | <b><math>D</math> [ <math>cm^2\ s^{-1}</math> ]</b> |
|------------------------|-----------------------------------------------|-----------------------------------------------|---------------------------------------------|--------------------------------------------------------|-----------------------------------------------------|
| <b>PS/C</b>            | 2.00                                          | 84.72                                         | 537.5                                       | $2.41 \times 10^{-6}$                                  | $4.2 \times 10^{-12}$                               |
| <b>PS</b>              | 6.54                                          | 85.73                                         | 535.5                                       | $2.39 \times 10^{-6}$                                  | $6.2 \times 10^{-12}$                               |
| <b>P</b>               | 13.52                                         | 124.90                                        | 842.0                                       | $1.53 \times 10^{-6}$                                  |                                                     |
